# Supplementary material
Source: publisher figshare collection journal article supplement (https://sage.figshare.com/ndownloader/files/18038027)
Supplement: Supplementary file 1 [file 18038027]

**Supplementary material 1.** Intercorrelation reported as Spearman's correlation coefficient for people with MS, between personal and MS-related variables, and variables reflecting functioning.

|                            | Age   | Sex   | Living situation | Work status | Education | Immuno-modulatory treatment | MS type | Ambulation status | Manual dexterity | Cognition | Mood |
|----------------------------|-------|-------|------------------|-------------|-----------|-----------------------------|---------|-------------------|------------------|-----------|------|
| Age                        |       | .06   | .04              | -.04        | -.01      | .09                         | .38**   | .35**             | .19**            | .26**     | -.09 |
| Sex                        | .06   |       | .11              | .00         | -.09      | .10                         | -.06    | .03               | -.11             | -.13      | .05  |
| Living situation           | .04   | .11   |                  | -.07        | -.05      | .05                         | .06     | .08               | .09              | .01       | .06  |
| Work status                | -.04  | .00   | -.07             |             | .06       | -.05                        | .03     | .13*              | -.07             | .02       | .10  |
| Education                  | -.01  | -.09  | -.05             | .06         |           | .05                         | .00     | .10               | .08              | .20**     | -.01 |
| Immunomodulatory treatment | .09   | .10   | .05              | -.05        | .05       |                             | .05     | .16**             | .18**            | .14       | -.08 |
| MS type                    | .38** | -.06  | .06              | .03         | .00       | .05                         |         | .55**             | .49**            | .44**     | .00  |
| Ambulation status          | .35** | .03   | .08              | .13*        | .10       | .16**                       | .55**   |                   | .54**            | .42**     | .04  |
| Manual dexterity           | .19** | -.11  | .09              | -.07        | .08       | .18**                       | .49**   | .54**             |                  | .35**     | -.02 |
| Cognition                  | .26** | -.13* | .01              | .02         | .20**     | .14                         | .44**   | .42**             | .35**            |           | .02  |
| Mood                       | -.09  | .05   | .06              | .10         | -.01      | -.08                        | .00     | .04               | -.02             | .02       |      |

MS: multiple sclerosis.

\*\*Correlation is significant at the 0.01 level.

\*Correlation is significant at the 0.05 level.
